# Supplementary material for: From oceans to forests, biodiversity powers climate-regulating services
Source: Research Square preprint supplement (doi:10.21203/rs.3.rs-8562138/v1), 2026-01-14
Supplement: Supplementary file 1 [file 1f860bffa160eef691e4e4f3.xlsx]

## Sheet: Sheet1
Column	Type	Notes
Date_data_entered	Sting	Date that you entered the data into this spreadsheet
DOI	String	Enter DOI (if you can’t find this add a hyperlink to the article).
Study_common_taxon	String	The Kingdom, Phylum, Class, Order, Family, Genus or Species or common name that is common to all taxa within this Study. If multiple kingdoms write this.
Location description (locale, city/state, country)	String	Where was the data collected?
GPS_latitude_centre	Number	GPS as Decimal degrees (DD), from gmaps (right click,"what's here" to get this format)
GPS_longitude_centre	Number	GPS as Decimal degrees (DD), from gmaps (right click,"what's here" to get this format)
spatial_extent_m2	Number	The area of the study site (or sites if data-point is averaged across sites), convert to meters squared.
spatial_grain	Number	The size of the unit of measurement (i.e. quadrat size of 1m^2).
Experiment or Observation	String	Was the data collected as part of an experiment (i.e., experimental plots with treatments applied) or though observation across natural gradients?)
Sample_start_earliest	Number	First date data collected, record to finest resolution given, dd:mm:yyy
Sample_end_latest	Number	First date data collected, record to finest resolution given, dd:mm:yyy
Sample_date_resolution	String	Finest level of date resoution given in the study: *Year *Month *Day
Experimental_duration_days	Number	If experimental data, how long in days did the experiment run for?
Biome_general	String	One of: *marine, *freshwater, *terrestial, *marine/freshwater
Predominant_landuse	String	Categories following IPBES
Landuse_intensity	String	see protocol for category definitions
Manipulation	String	name any relevant manipulaitons from the study, if any.
DOI_linked	Sring	Link DOI from the 'data description' sheet
Location(if multiple)_linked	String	Link study location (if one study uses multiple locations) from the 'data description' sheet
Taxon(if multiple)_linked	String	Link study taxon (if one study uses multiple taxa) from the 'data description' sheet
Biodiversity_value_x	Number	biodiversity data, if averages try to capture n and sd below
Biodiversiy_value_SD	Number	standard deviaiton
Biodiversiy_value_N	Number	how many data points per average value
Biodiversity_x_axis_description	String	description of the method used to measure diversity, take from x axis
Biodiversity_type	String	Type of data collected
Biodiversity_measurment_unit	String	What unit was used to collect the biodiversity data?
Biodiversity_metric	String	the specifc metric used in the study, see biodiversity metric categories tab for examples
Ecosystem_function_value_y	Number	Ecosystem function data points, if averages try to capture n and sd below
Ecosystem_function_value_SD	Number	standard deviaiton
Ecosystem_function_value_N	Number	how many data points per average value
Ecosystem_function_unit	String	What unit was used to collect the ecosystem function data? take from the y-axis
Ecosystem_function_y_axis_description	String	What is the ecosystem function measured? take from the y-axis
Ecosystem_function_metric	String	categories following IPBES
Ecosystem_function_metric_v2	String	As above, but with combined freshwater NPP, terrestrial NPP, and marine NPP into one category - 'NPP' which was used for the biome analysis
Data_capture_method	String	method used to enter the data into the spreadsheet
Table_or_figure_number	String	Table or figure from which the data were derived from
label	String	unique dataset identifier
