# Supplementary material for: From oceans to forests, biodiversity powers climate-regulating services
Source: Research Square preprint supplement (doi:10.21203/rs.3.rs-8562138/v1), 2026-01-14
Supplement: Supplementary file 2 [file 42f0a4ee73280a92c3b47dec.xlsx]

## Sheet: DOI_list
First Author	Publication Year	DOI/ Title
Akre	2016-12-15	10.1002/ecs2.1595
Andrey	2014-05-28	10.1002/ece3.1118
Arnone	2013-02-07	10.1007/s00442-012-2585-4
Aros-Mualin	2021-01-11	10.3389/fpls.2020.615723
Baert	2016-09-30	10.1002/ecy.1601
Bar-Massada	2020-11-04	10.1071/WF20015
Bestion	2021-08-26	10.1073/pnas.2019591118
Bhandari	1905-07-07	Diversity and productivity of semi-arid grassland of inner mongolia: Influence of plant functional type and precipitation
Bracken	2008-01-15	10.1073/PNAS.0704103105
Cadotte	2013-05-15	10.1073/pnas.1301685110
Cannicci	2021-07-26	10.1073/pnas.2016913118
Chen	2021-10-20	10.3390/agronomy11112092
Chi	2019-11-22	10.1002/ece3.5857
Deng	2014-11-06	10.1016/S2095-3119(13)60590-0
Dukes	2003-02-13	10.1007/s004420000549
Dyola	1905-07-14	10.1002/ecs2.4107
Flombaum	2008-04-22	10.1073/pnas.0704801105
Flombaum	2011-10-03	doi.org/10.1890/11-0722.1
Galandis	1905-07-04	Long-term invasibility patterns in Mediterranean grasslands of varying initial diversities
Genung	2014-03-13	10.7717/peerj.288
Gross	2004-12-27	10.1034/j.1600-0706.2000.890301.x
Gu	2022-08-13	10.1002/ecy.3842
Guo	2021-02-17	doi.org/10.21203/rs.3.rs-244027/v1
Hopper	1905-06-19	The Effects of Plant Composition and Diversity on Ecosystem Processes
Hu	1905-07-05	Positive plant diversity-soil stability relationships are mediated through roots in the Songnen Grassland: Chronosequence evidence
Jennings	2005-05-20	10.1007/s00442-005-0011-x
Jourdan	2020-10-27	doi.org/10.1007/s10342-020-01329-w
Kaspari	2004-06-03	10.1007/s00442-004-1607-2
Kennedy	2022-09-28	10.1029/2022GB007481
Knops	2003-02-13	10.1007/s004420000537
Kozlov	2022-01-14	10.3390/insects13010094
Krämer	2010-02-15	10.1002/eco.103
Kudo	2011-08-08	10.1002/ece3.9
Kudo	2010-11-11	doi.org/10.1657/1938-4246-42.4.438
Kutiel	2022-01-31	10.1007/BF00040757
Lama	2020-07-31	10.1007/s00442-020-04717-6
Lanta	2012-05-12	10.1007/s00114-012-0922-4
Leimer	2013-12-12	10.1002/eco.1464
Leimer	2018-02-06	10.1002/eco.1945
Li	2016-09-06	10.1002/ldr.2607
Li	2021-09-04	10.3389/fpls.2021.704138
Liu	2022-04-21	10.1002/ece3.8838
Liu	2019-05-16	10.1002/ldr.3349
Liu	2022-03-15	10.1002/ldr.4259
Ma	2021-11-23	10.1007/s00027-021-00833-4
Ma	2020-08-17	10.1007/s10021-020-00543-2
Ma	2021-06-07	10.3389/fevo.2021.650001
Iturrate-Garcia	2016-10-18	10.1002/ece3.2548
Maron	2021-12-10	10.1002/ecm.1497
McNicol	2017-09-07	10.1007/s10021-017-0180-6
Mensah	2018-04-24	10.1007/s00442-018-4144-0
Mensah	2016-04-09	10.3390/f7040079
Momota	2017-01-31	10.7717/peerj.2952
Mouillot	2014-09-16	10.1073/pnas.1317625111
Na	2016-10-21	10.1071/RJ15094
Núñez-Olivera	2004-10-30	10.1007/BF00045504
Nascimento	2010-12-15	10.1007/s00442-010-1865-0
Oehri	2017-09-06	10.1073/pnas.1703928114
Pasari	2013-06-04	10.1073/pnas.1220333110
Pastore	2021-04-19	10.1073/pnas.2016965118
Pawlowska	2011-01-06	10.1007/s00300-010-0940-7
Pfisterer	2014-12-22	10.1007/s00442-002-1169-0
Pfisterer	2005-08-18	10.1078/1439-1791-00215
Pires	1905-07-07	Plant species richness increases the spatial stability of litter mass in Brazilian Pantanal
Pozzobom	2020-05-14	10.1007/s00027-020-00730-2
Qi	2022-01-27	10.3389/fpls.2021.772503
Raes	2018-08-14	10.1073/pnas.1719335115
Ren	1905-07-15	The influences of small dam on macroinvertebrates diversity and temporal stability in stream ecosystem
Rixen	2005-07-25	https://doi.org/10.1007/s00442-005-0196-z
Roca	2019-09-26	10.1002/rse2.129
Roger	2016-07-16	10.1002/ecy.1518
Rosenfield	1905-07-06	Forest biomass variation in Southernmost Brazil: the impact of Araucaria trees
Rybicki	2010-07-29	10.4319/lo.2007.52.3.1195
Rychtecká	2014-06-19	10.1007/s00114-014-1198-7
Wehn	2018-04-13	10.5194/we-18-55-2018
Salgado	2021-07-16	10.1002/rra.3839
Sarneel	2014-09-18	10.1007/s10021-014-9805-1
Segura	2021-12-09	10.3390/f12121730
Setshedi	2020-09-07	10.3390/agriculture10090395
Shunatova	2018-02-02	10.1007/s00300-018-2263-z
Sugie	2016-12-17	10.1002/lno.10473
Tian	2017-01-20	10.3390/ijerph14010095
Tsuyuzaki	2017-12-28	10.1007/s00300-017-2236-7
Vadrucci	2003-10-31	10.1002/aqc.590
Valencia	2020-09-08	10.1073/pnas.1920405117
Valliere	2020-02-05	10.1002/ecs2.3032
van der Heijden	2002-07-26	10.1038/23932
van der Plas	2016-03-16	10.1073/pnas.1517903113
Van der Putten	2002-08-25	10.1007/s004420050028
van Rooijen	2015-07-24	10.1007/s10021-015-9905-6
Wagg	2021-03-23	10.7554/eLife.62813
Wang	2013-10-24	10.1007/s00267-013-0186-6
Wang	2016-03-08	10.3390/rs8030214
Wardle	2004-11-15	10.1034/j.1600-0706.2000.890102.x
Whitford	2002-12-22	10.1023/A:1005987219356
Wondimu	2021-06-28	https://doi.org/10.1186/s13717-021-00322-4
Ze Zhang	2022-10-05	10.1002/ece3.9385
Zhou	2022-10-11	10.1007/s10021-022-00790-5
Zhou	2022-09-29	10.3390/su141912152
Zirbel	2019-01-29	10.1002/ecy.2634
Duarte	2020-08-05	10.1007/s10452-020-09789-3
Constán-Nava	2014-09-30	10.1007/s10530-014-0780-4
Chalcraft	2008-09-23	10.1007/s10531-008-9457-6
Márialigeti	2009-01-30	10.1007/s10531-009-9586-6
Cerrano	2009-08-31	10.1007/s10531-009-9712-5
de Araújo	2013-03-20	10.1007/s10531-013-0474-8
Hodapp	2013-12-28	10.1007/s10531-013-0609-y
Miranda	2014-10-09	10.1007/s10531-014-0813-4
Setiawan	2016-01-04	10.1007/s10531-015-1044-z
Ronk	2016-12-21	10.1007/s10531-016-1278-4
Vasconcelos	2019-02-07	10.1007/s10531-019-01708-9
Heydari	2020-06-13	10.1007/s10661-020-08378-z
Schmera	2012-04-18	10.1007/s10750-012-1107-z
Otwoma	2017-08-29	10.1007/s10750-017-3363-4
Larentis	2021-11-16	10.1007/s10750-021-04756-x
Aragón	2011-07-06	10.1007/s10980-011-9625-z
Shumi	2020-12-04	10.1007/s10980-020-01170-x
De Boeck	2006-09-27	10.1007/s11104-006-9112-5
Karanika	2007-07-06	10.1007/s11104-007-9320-7
Wang	2016-04-19	10.1007/s11104-016-2897-y
Sun	2018-11-13	10.1007/s11104-018-3877-1
Hu	2022-10-05	10.1007/s11104-022-05731-8
Takyu	2005-03-02	10.1007/s11284-005-0044-y
Cai	2016-04-25	10.1007/s11284-016-1361-z
Tian	2017-03-15	10.1007/s11356-017-8758-2
Li	2022-11-05	10.1007/s11356-022-23938-1
Taft	2017-07-14	10.1007/s11829-017-9539-z
Kapkoti	2016-06-13	10.1007/s40009-016-0500-y
Yang	2019-11-08	10.1007/s40333-019-0068-8
Toledo-Lima	2020-08-14	10.1007/s43388-020-00016-z
Roscher	2008-12-03	10.1016/j.actao.2008.10.003
Azcárate	2013-04-25	10.1016/j.actao.2013.03.011
Haberl	2004-02-25	10.1016/j.agee.2003.07.004
Haberl	2005-04-26	10.1016/j.agee.2005.03.009
Clough	2006-08-01	10.1016/j.agee.2006.05.028
Uyttenbroeck	2017-08-31	10.1016/j.agee.2017.08.014
Goulnik	2020-07-01	10.1016/j.agee.2020.107033
Liu	2021-06-28	10.1016/j.agrformet.2021.108526
Chen	2022-07-30	10.1016/j.agrformet.2022.109101
Zhao	2018-01-31	10.1016/j.aspen.2018.01.017
Zhang	2012-08-24	10.1016/j.atmosenv.2012.08.034
Wacker	2007-10-02	10.1016/j.baae.2007.08.003
Gross	2009-11-05	10.1016/j.baae.2009.09.001
Palmu	2014-03-14	10.1016/j.baae.2014.03.001
Weisser	2017-06-27	10.1016/j.baae.2017.06.002
Hatfield	2007-08-17	10.1016/j.biocon.2007.06.019
McWilliam	2018-11-01	10.1016/j.cub.2018.09.025
Halme	2008-06-19	10.1016/j.ecolind.2008.04.005
Pinto	2012-07-20	10.1016/j.ecolind.2012.06.022
Santos	2014-09-19	10.1016/j.ecolind.2014.08.033
Verma	2020-09-25	10.1016/j.ecolind.2020.106987
Omidipour	2020-12-22	10.1016/J.ECOLIND.2020.107212
Hu	2022-03-10	10.1016/j.ecolind.2022.108762
Wang	2022-04-14	10.1016/j.ecolind.2022.108858
Nakamoto	2018-03-31	10.1016/j.ecss.2018.03.020
Boeck	2006-09-07	10.1016/j.envexpbot.2006.07.001
Wang	2021-04-19	10.1016/j.envint.2021.106494
Mölder	2008-06-03	10.1016/j.foreco.2008.04.012
Sobek	2009-05-31	10.1016/j.foreco.2009.04.026
Van Con	2013-09-12	10.1016/j.foreco.2013.08.034
Perring	2015-02-27	10.1016/j.foreco.2015.02.012
Selvi	2016-02-22	10.1016/j.foreco.2016.02.013
Arasa-Gisbert	2018-02-27	10.1016/j.foreco.2018.02.023
Pinto	2018-03-29	10.1016/j.foreco.2018.03.029
Ali	2018-05-26	10.1016/j.foreco.2018.05.015
Ali	2018-07-04	10.1016/j.foreco.2018.06.042
Song	2019-04-25	10.1016/j.foreco.2019.04.015
Ali	2020-02-12	10.1016/j.foreco.2020.117968
Li	2020-08-08	10.1016/j.foreco.2020.118479
Jin	2020-11-10	10.1016/j.foreco.2020.118746
Matevski	2020-11-24	10.1016/j.foreco.2020.118775
Siddique	2021-01-13	10.1016/j.foreco.2020.118848
Donfack	2021-07-09	10.1016/j.foreco.2021.119480
Stojek	2022-08-11	10.1016/j.foreco.2022.120451
Leung	2015-09-20	10.1016/j.gecco.2015.08.005
Xu	2019-11-03	10.1016/j.gecco.2019.e00832
Zuo	2019-12-02	10.1016/j.gecco.2019.e00864
Sasaki	2021-11-27	10.1016/j.jaridenv.2021.104690
Gladstone-Gallagher	2018-02-03	10.1016/j.jembe.2018.01.002
Zakkak	2015-09-15	10.1016/j.jenvman.2015.09.005
Wu	2018-10-31	10.1016/j.jenvman.2018.10.097
Hellicar	2022-05-23	10.1016/j.jnc.2022.126207
Barnes	2021-10-13	10.1016/j.marenvres.2021.105500
Lanari	2021-11-04	10.1016/j.marenvres.2021.105519
Badano	2009-05-09	10.1016/j.ppees.2009.03.002
Roscher	2016-03-24	10.1016/j.ppees.2016.03.003
Gordijn	2018-07-30	10.1016/j.ppees.2018.07.005
Benavides	2018-12-27	10.1016/j.ppees.2018.12.002
Phillips	2008-06-27	10.1016/j.rse.2008.04.012
Wang	2018-04-24	10.1016/j.rse.2018.04.010
Wang	2022-07-16	10.1016/j.rse.2022.113169
Means	2016-12-01	10.1016/j.scitotenv.2016.11.134
Yuan	2018-02-23	10.1016/j.scitotenv.2018.02.125
Li	2018-11-05	10.1016/j.scitotenv.2018.11.024
Li	2020-02-12	10.1016/j.scitotenv.2020.137252
Hossain	2022-03-04	10.1016/j.scitotenv.2022.154322
Zhang	2022-06-23	10.1016/j.scitotenv.2022.156947
Guo	2022-10-11	10.1016/j.scitotenv.2022.159367
Ma	2018-03-20	10.1016/j.soilbio.2018.03.015
Chen	2018-12-10	10.1016/j.soilbio.2018.12.008
Porazinska	2021-08-05	10.1016/j.soilbio.2021.108380
Zhou	2022-07-06	10.1016/j.soilbio.2022.108774
Joshi	2021-10-02	10.1016/j.tfp.2021.100147
Chaudhury	2022-07-04	10.1016/j.tfp.2022.100296
Haedo	2017-05-11	10.1016/j.ufug.2017.04.017
Vibrans	2022	10.1016/jforeco.2021.119902
Loreau	2002-07-26	10.1038/35083573
McGrady-Steed	2002-07-26	10.1038/36561
Tilman	2003-08-12	10.1038/367363a0
Tilman	2003-06-13	10.1038/379718a0
Awasthi	2014-06-13	10.1038/ismej.2014.91
Bell	2005-08-24	10.1038/nature03891
Tilman	2006-05-31	10.1038/nature04742
Hector	2007-07-11	10.1038/nature05947
Wittebolle	2009-03-08	10.1038/nature07840
Delgado-Baquerizo	2016-01-28	10.1038/ncomms10541
Lange	2015-04-07	10.1038/ncomms7707
Wang	2019-07-19	10.1038/s41467-019-11191-z
Boyero	2021-06-17	10.1038/s41467-021-23930-2
Jonsson	2019-01-09	10.1038/s41477-018-0346-z
Hautier	2017-11-30	10.1038/s41559-017-0395-0
Pennekamp	2018-10-16	10.1038/s41586-018-0627-8
Phillips	2021-05-21	10.1038/s41597-021-00912-z
Paijmans	2020-03-20	10.1038/s41598-020-61560-8
Bianchelli	2020-11-17	10.1038/s41598-020-76817-5
Oindo	2002-07-26	10.1046/j.1365-2028.2001.00322.x
Spehn	2003-03-11	10.1046/j.1365-2435.2000.00437.x
Gonzalez	2003-03-12	10.1046/j.1365-2656.2002.00625.x
Polley	2003-03-11	10.1046/j.1461-0248.2003.00422.x
Smith	2003-05-08	10.1046/j.1461-0248.2003.00454.x
Montoya	2003-06-13	10.1046/j.1461-0248.2003.00469.x
Hooper	2004-12-23	10.1046/j.1461-0248.2003.00555.x
Remmer	2019-06-05	10.1080/02705060.2019.1614104
Berauer	2019-06-21	10.1080/15230430.2019.1618116
McNaughton	2002-07-26	10.1086/283181
Kaspari	2002-07-26	10.1086/303313
Hawkins	2003-01-17	10.1086/345479
Symonds	2008-02-06	10.1086/528960
Zhao	2018-09-24	10.1093/aesa/say038
Montesinos-Navarro	2014-12-02	10.1093/aob/mcu228
McBride	2014-12-02	10.1093/aobpla/plu057/159343
Masumoto	2021-09-08	10.1093/femsec/fiab129
Andrade	2016-06-07	10.1093/femsec/fiw102
Kolding	2015-12-15	10.1093/icesjms/fsv225
Li	2021-03-06	10.1093/jpe/rtab021
Peng	2017-02-03	10.1093/jpe/rtw016
Brezzi	2017-02-03	10.1093/jpe/rtw038
Bakker	2016-10-13	10.1093/jpe/rtw111
Sagar	2017-09-16	10.1093/jpe/rtx052
Drake	2003-09-10	10.1098/rspb.2003.2423
Fargione	2007-01-10	10.1098/rspb.2006.0351
Post	2013-02-20	10.1098/rspb.2012.2722
Fornoff	2019-03-06	10.1098/rspb.2018.2399
Naeem	1995	10.1098/rstb.1995.0025
Cesarz	2020-02-01	10.1101/2020.01.30.927277
Schmidt	2021-01-05	10.1101/2021.01.04.425301
Jucker	2015-02-21	10.1111/1365-2435.12428
Baquerizo	2017-06-20	10.1111/1365-2435.12924
Garibotti	2018-01-15	10.1111/1365-2435.13044
Luo	2018-03-31	10.1111/1365-2435.13109
Mensah	2020-05-13	10.1111/1365-2435.13585
Ghedini	2021-10-20	10.1111/1365-2435.13955
Laws	2018-08-13	10.1111/1365-2656.12897
Gebert	2019-08-14	10.1111/1365-2656.13074
Maravalhas	2019-09-26	10.1111/1365-2656.13111
Nash	2021-05-06	10.1111/1365-2656.13505
Orford	2016-01-10	10.1111/1365-2664.12608
Oram	2020-05-16	10.1111/1365-2664.13667
Schuldt	2022-09-23	10.1111/1365-2664.14300
Jucker	2014-05-27	10.1111/1365-2745.12276
Kessler	2014-07-17	10.1111/1365-2745.12299
Zhang	2017-11-09	10.1111/1365-2745.12903
Zheng	2019-01-28	10.1111/1365-2745.13142
Sasaki	2019-02-09	10.1111/1365-2745.13151
Ye	2019-04-19	10.1111/1365-2745.13192
Ouyang	2019-04-21	10.1111/1365-2745.13194
Muraina	2021-01-15	10.1111/1365-2745.13587
Ding	2021-10-09	10.1111/1365-2745.13788
Li	2022-04-25	10.1111/1365-2745.13900
Lu	2022-08-13	10.1111/1365-2745.13982
da Silva	2016-02-08	10.1111/avsc.12230
Beirão	2020-10-16	10.1111/btp.12860
Vilmi	2017-09-01	10.1111/ddi.12594
Radinger	2019-01-16	10.1111/ddi.12895
Ng	2022-04-06	10.1111/ddi.13526
Wu	2014-10-20	10.1111/ecog.00940
Speed	2019-04-04	10.1111/ecog.04347
Staab	2014-07-31	10.1111/een.12143
Gontijo	2014-09-16	10.1111/een.12152
Pérez‐Sánchez	2021-07-19	10.1111/een.13069
Kreyling	2017-09-20	10.1111/ELE.12848
Adair	2018-08-29	10.1111/ele.13145
Bestion	2020-01-11	10.1111/ele.13444
Conradi	2020-02-22	10.1111/ele.13481
Schmidt	2021-11-22	10.1111/evo.14407
Velghe	2012-09-25	10.1111/fwb.12017
Lamothe	2019-09-10	10.1111/fwb.13395
Borthagaray	2020-09-29	10.1111/fwb.13603
Seabloom	2013-08-26	10.1111/gcb.12370
Magnago	2015-04-01	10.1111/gcb.12937
Cowles	2015-10-01	10.1111/GCB.13111
Zhang	2015-10-29	10.1111/gcb.13140
Prommer	2019-07-25	10.1111/gcb.14777
Schnabel	2019-09-05	10.1111/gcb.14792
Vetter	2020-02-03	10.1111/gcb.15025
Chen	2022-01-18	10.1111/gcb.16086
Ruiz‐Benito	2013-10-30	10.1111/geb.12126
Cavanaugh	2014-01-15	10.1111/geb.12143
Feng	2020-05-07	10.1111/geb.13110
Craven	2020-08-14	10.1111/geb.13165
Ouyang	2020-12-10	10.1111/geb.13235
Rovai	2021-02-27	10.1111/geb.13268
Zhang	2021-10-02	10.1111/geb.13408
Qiao	2022-03-13	10.1111/geb.13488
Jiang	2007-12-03	10.1111/j.0030-1299.2007.15371.x
Bailey	2004-03-30	10.1111/j.0906-7590.2004.03631.x
Perner	2005-07-15	10.1111/j.0906-7590.2005.04119.x
Kumschick	2009-10-20	10.1111/j.1365-2311.2009.01127.x
Slocum	2008-03-27	10.1111/j.1365-2427.2008.02002.x
Vogy	2010-02-26	10.1111/j.1365-2427.2010.02397.x
Maceda-Veiga	2010-04-15	10.1111/j.1365-2427.2010.02407.x
Weyhenmeyer	2012-03-27	10.1111/j.1365-2427.2012.02779.x
Kahmen	2005-08-19	10.1111/j.1365-2435.2005.01001.x
Zhou	2006-07-25	10.1111/j.1365-2435.2006.01175.x
Wilson	2009-02-17	10.1111/j.1365-2486.2009.01896.x
Song	2012-05-11	10.1111/j.1365-2486.2012.02738.x
Parolo	2011-07-18	10.1111/j.1365-2494.2011.00810.x
Kirwan	2007-04-29	10.1111/j.1365-2745.2007.01225.x
Fornara	2008-02-02	10.1111/j.1365-2745.2007.01345.x
Arnone	2011-04-16	10.1111/j.1365-2745.2011.01813.x
Wang	2007-03-27	10.1111/j.1461-0248.2007.01031.x
Isbell	2009-03-10	10.1111/j.1461-0248.2009.01299.x
Haddad	2009-08-21	10.1111/j.1461-0248.2009.01356.x
Yang	2012-04-10	10.1111/j.1461-0248.2012.01778.x
Sandin	2008-09-24	10.1111/j.1466-8238.2008.00418.x
Fock	2008-12-15	10.1111/j.1466-8238.2008.00435.x
Hatanaka	2010-09-09	10.1111/j.1466-8238.2010.00591.x
Cooper	2011-07-27	10.1111/j.1468-0459.2011.00426.x
Boeck	2007-06-07	10.1111/j.1469-8137.2007.02122.x
Sobek	2009-03-13	10.1111/j.1472-4642.2009.00570.x
Virtanen	2012-09-21	10.1111/j.1600-0587.2012.07903.x
Griffin	2008-11-25	10.1111/j.1600-0706.2008.16960.x
Creed	2009-01-15	10.1111/j.1600-0706.2008.17212.x
Ellis	2009-12-18	10.1111/j.1600-0706.2009.17695.x
Gustafsson	2010-12-16	10.1111/j.1600-0706.2010.19008.x
Wesner	2011-05-10	10.1111/j.1600-0706.2011.19413.x
Vetaas	2019-04-10	10.1111/jbi.13564
Schmidt	2022-09-19	10.1111/jbi.14480
Feßel	2015-07-14	10.1111/jvs.12326
Pedro	2017-02-24	10.1111/jvs.12505
Fergus	2017-08-04	10.1111/jvs.12563
Du	2019-08-20	10.1111/jvs.12806
Chaves	2020-09-23	10.1111/jvs.12952
Li	2020-11-03	10.1111/jvs.12970
Joner	2021-07-10	10.1111/jvs.13060
Rey	2016-03-09	10.1111/nph.13916
Steudel	2016-06-15	10.1111/nph.14054
Gao	2016-11-07	10.1111/nph.14287
Joly	2017-02-09	10.1111/nph.14452
Dorado	2014-04-10	10.1111/oik.00983
Strecker	2016-03-19	10.1111/oik.03181
Ebeling	2017-07-13	10.1111/oik.04210
Mori	2017-05-02	10.1111/oik.04345
Huang	2020-04-20	10.1111/oik.07032
Dolezal	2020-07-13	10.1111/oik.07379
Bowker	2021-06-21	10.1111/oik.08473
Holmquist	2014-06-18	10.1111/rec.12111
Maestre	2012-01-12	10.1126/science.1215442
Tilman	2002-07-27	10.1126/science.277.5330.1300
Hector	2002-07-27	10.1126/science.286.5442.1123
Stachowicz	2002-07-27	10.1126/science.286.5444.1577
Novoselov	2022-06-07	10.1134/S1067413622030080
Sang	2021-10-22	10.1186/s13717-021-00337-x
Liang	2020-07-22	10.1186/s40657-020-00212-x
Vargas-Larreta	2021-01-31	10.1186/s40663-021-00282-3
Pigot	2016-03-14	10.1371/journal.pbio.1002407
Báez	2008-06-04	10.1371/journal.pone.0002332
Proulx	2010-10-13	10.1371/journal.pone.0013382
Hector	2011-03-02	10.1371/journal.pone.0017434
Lange	2014-05-09	10.1371/journal.pone.0096182
Ebeling	2014-09-16	10.1371/journal.pone.0106529
Knapp	2015-04-11	10.1371/journal.pone.0123052
Hertzog	2016-02-09	10.1371/journal.pone.0148768
Liu	2016-04-21	10.1371/journal.pone.0154026
Wein	2016-12-19	10.1371/journal.pone.0168751
Häkkilä	2017-09-26	10.1371/journal.pone.0184792
Ojha	2017-11-15	10.1371/journal.pone.0187106
Ingty	2021-01-07	10.1371/journal.pone.0245221
Fricke	2022-04-29	10.1371/journal.pone.0264881
Souza	2020-11-25	10.1590/1678-4766e2020027
Symstad	2006-07-13	10.1641/0006-3568(2003)053[0089:LTALSP]2.0.CO;2
Klanderud	2008-11-13	10.1657/1523-0430(07-075)[KLANDERUD]2.0.CO;2
Naeem	2007-06-04	10.1890/0012-9658(1998)079[2603:CSRAAB]2.0.CO;2
Tylianakis	2007-06-04	10.1890/0012-9658(2006)87[3047:DEFASO]2.0.CO;2
Cardinale	2007-06-04	10.1890/03-0727
Spehn	2007-06-06	10.1890/03-4101
Wilsey	2007-06-04	10.1890/04-0245
Hooper	2007-06-06	10.1890/04-0922
Witman	2008-11-06	10.1890/07-1201.1
Cardinale	2009-05-18	10.1890/08-1038.1
Hermoso	2010-06-22	10.1890/09-2011.1
Connolly	2011-07-15	10.1890/10-2270.1
von Felten	2012-05-01	10.1890/11-1439.1
Sapijanskas	2014	10.1890/13-1366.1.hal-02964493
Steinauer	1905-07-07	10.1890/14-0088..1
Ziter	2013-07-27	10.1890/ES13-00135.1
Belote	2014-02-13	10.1890/ES13-00266.1
Schaefer	2012-08-09	10.1899/11-107.1
Van Voris	2006-05-09	10.2307/1939044
Cadotte	2012	10.2307/23229920
Hooper	2006-04-17	10.2307/2657146
Mitchell	2007-02-02	10.2307/3071990
Frank	2006-11-16	10.2307/3545501
Naeem	2006-11-16	10.2307/3546198
Symstad	2006-11-16	10.2307/3547058
Tao	2020-05-19	10.3161/15052249PJE2020.68.1.006
Arenas	2009-04-17	10.3354/meps07950
Travers	2011-11-23	10.3354/meps09501
Cermeño	2013-06-12	10.3354/meps10443
Forster	2007-08-10	10.3354/meps311191
Rodil	2021	10.1007/s10531-021-02234-3
Taniguchi	2022	10.1016/j.ecolind.2022.108686
Lin	2012	10.1371/journal.pone.0048244
